# Supplementary material for: Contaminants of emerging concern in fresh leachate from landfills in the conterminous United States
Source: Royal Society of Chemistry journal article supplement (doi:10.1039/c4em00124a), 2014-01-01
Supplement: c4em00124a1.xlsx [file c4em00124a1.xlsx]

## Sheet: Table1S_AncillaryVar
Landfill Characteristic	LF 1	LF 2	LF 3	LF 4	LF 5	LF 6	LF 7	LF 8	LF 9	LF 10	LF 11	LF 12	LF 13	LF 14	LF 15	LF 16	LF 17	LF 18	LF 19
Landfill Waste Composition (%)
Municipal waste	100	70	70	65	80	100	83	100	62	63	62	70	90	71	25	70	85	84	85
Construction/debris	0	20	19	15	20	0	14	0	28	19	28	12	7	3	18	25	10	16	9
Wastewater sludge	0	2	10	0	0	0	3	0	3	2	3	0	0	5	11	0	4	0	5
Industrial waste	0	8	1	20	0	0	0	0	7	16	7	0	3	21	50	5	1	0	1
Landfill/Waste Information
Sampling date	2011-06-14	2011-10-26	2011-07-21	2011-08-10	2011-09-07	2011-06-13	2011-06-13	2011-10-27	2011-11-09	2011-12-20	2011-11-30	2011-08-10	2011-08-31	2011-12-13	2011-12-20	2011-12-14	2011-07-28	2011-11-09	2011-09-08
Region of United States	northeast	pacific-west	northeast	midwest	midwest	northeast	northeast	pacific-west	central southwest	southeast	central southwest	central southwest	southeast	pacific-west	southeast	mountain west	central southwest	mountain west	mountain west
Municipal/Private owned	municipal	municipal	municipal	municipal	private	municipal	municipal	municipal	private	private	private	municipal	municipal	private	private	private	municipal	municipal	municipal
Annual waste load (Mtonsa)	0.0042	0.3	0.22	0.125	0.27	0.03	0.01	0.8	0.55	0.768761	0.55	0.141	0.31	1.43226	1.2	2.0001	0.14313	0.186	0.96
Time period of received waste	1983-2011	1991- 2011	1995- 2002	1995- 2011	1972- 2011	1990-2011	1950- 2011	2000-2010	1993- 2006	2007- 2009	2005- 2011	1993- 2011	1992- 2011	1991- 2011	1990- 2011	2005- 2011	1995- 2011	1990- 2011	2006- 2011
Age range of waste (years)	28-1	20-1	16-9	16-1	39-1	21-1	61-1	11-1	13-5	4-2	6-1	18-1	19-1	20-1	21-1	6-1	16-1	21-1	5-1
Maximum age of waste (years)	28	20	16	16	39	21	61	11	13	4	6	18	19	20	21	6	16	21	5
Age of receiving waste category	old	moderate	moderate	moderate	old	old	old	young	moderate	young	young	moderate	moderate	moderate	old	young	moderate	old	young
Annnual leachate production (Mgalb)	12	7.7	1.2	12.7	8	15	15	200	1.164	4.14384	1.164	6.7	4.5	4.6	58	0.3	0.59447	4	0.06
Sampling source	manhole	pump	pump	manhole	pump	manhole	manhole	manhole	pump	pump	pump	pump	manhole	pump	pump	pump	pump	manhole	pump
Leachate disposal practice	river	wwtpc	wwtpc	wwtpd	wwtpc	wwtpd	wwtpd	wwtpd	wwtpd	wwtpd	wwtpd	wwtpd	wwtpd	irrigated on landill tipe	wwtpd	irrigated on landill tipe	Injected into landfillf	evapora-tion pond	gas flare
Climate
Average annual precipitationi (centimeters)	107.95	69.85	107.95	95.25	69.85	107.95	107.95	139.7	95.25	107.95	95.25	107.95	95.25	31.75	139.7	44.45	95.25	44.45	19.05
Average annual temperature (°F)	45	50	42	50	42	42	45	48	61	56	61	60	56	61	75	45	64	44	70
Geochemistry
Specific conductance (µS/cm)	5510	8170	10100	7880	5050	3160	1990	15000	6760	14100	9310	3590	3520	15400	16500	1890	1720	2070	5050
pH	7.58	7.66	7.57	7.61	7.53	6.54	6.73	6.78	7.54	7.17	6.84	7.64	7.06	7.5	7	6	7.14	6.56	7.61
Landfill Characteristic	LF 1	LF 2	LF 3	LF 4	LF 5	LF 6	LF 7	LF 8	LF 9	LF 10	LF 11	LF 12	LF 13	LF 14	LF 15	LF 16	LF 17	LF 18	LF 19
NH4+ (mg/L)	170.466	959.411	1610	645.188	547.315	96.9842	73.8296	1150	133.931	1160	376.038	504.818	399.218	503.143	1790	37.9901	12.6591	12.9166	100.448
Alk (HCO3- mg/L)	2040	607	9940	5600	4820	1290	1020	8330	7010	7270	8250	3540	2460	5120	12200	4210	1330	1690	900
Cl- (mg/L)	742.3	2249.5	2310	1880	1200	262.33	167.224	1530	1409.86	1800	1520	954.948	1020	3040	2830	519.536	419.037	588.477	1420
Br- (mg/L)	1.682	9.8709	6.7988	13.7656	9.2236	1.611	2.82245	230	9.0628	8.7154	23.7601	8.2372	5.685	40.4754	22.3516	2.2999	1.6411	2.1567	3.2011
NO3- (mg/L)	<0.1	0.2999	<0.1	1.03535	<0.1	<0.1	<0.1	2.0714	0.1129	0.27	<0.1	3.6177	<0.1	<0.15	0.4364	<0.07	<0.1	0.0937	0.2814
PO42- (mg/L)	<0.1	25.5226	<0.1	<0.1	1.1007	1.2923	0.01	<0.1	<0.1	14.6	<0.1	<0.1	<0.1	<1.9	19.7422	0.91581	<0.1	<0.1	<0.1
SO42- (mg/L)	108.318	3.5027	82	47.525	87.3314	17.1266	54.0159	302.394	0.391	14.1941	1.11	7.6526	13.5042	3430	18.0428	20.1	312.283	3.4478	2040
NVDOCg (mg/L)	140.203	887.831	2040	195.175	485.316	406.889	164.286	6110	241.064	1040.32	419.74	366.621	437.791	480.744	1130	164	18.3866	69.8928	12.9786
B (mg/L)	3.9	22.72	22.14	12.5	15.15	2.37	1.99	12.145	3.905	16.82	11.9225	3.36	0.21	20.17	8.965	1	0.31	0.36	7.335
Ca (mg/L)	162.2	144.23	97.785	247.17	328.825	112.4	132.855	916.28	284.98	74.4183	208.925	141.285	109	110.803	49.4807	388	306.485	444.28	232.175
Fe (mg/L)	5.7	2.93	13.415	4.125	5.76	0.67	4.77	77.775	21.195	2.87	6.3075	3.925	0.3	1.38	3.445	14	0.43	48.13	1.895
K (mg/L)	223.1	571	724.25	374.05	239.2	100.115	63.19	578	94.075	521.325	199.95	242	230	232.325	698.575	35	7.425	10.275	14.88
Mg (mg/L)	80.5	102.08	112.985	231	162.375	47.3125	40.915	195.73	207.105	85.2103	173.915	60.9	100	1130	53.9552	75	125.885	162.03	93.075
Na (mg/L)	658.5	1860	2550	1670	1080	269.875	164.65	1530	634.065	1780	1210	866.295	720	2310	1890	359	263.565	169.365	1490
Si (mg/L)	11.1	47.205	46.1235	26.6238	36.1475	9.02	9.865	35.14	27.1725	41.3896	35.0325	18.9	27.7	36.8559	26.4399	32	10.5633	13.695	23.693
Ag (µg/L)	3.44204	<0.5	<0.5	<0.5	<0.5	2.70812	1.37305	<0.5	<0.5	0.608415	<0.5	<0.5	<0.5	<0.5	<0.5	<0.5	<0.5	<0.5	0.52864
Al (µg/L)	344.653	310	600	280	420	238.886	184.599	201.341	80	643.588	611.16	80	445	266.906	1180	273.532	140	170	1100
As (µg/L)	17.0051	144.384	615.147	47.2224	65.1765	24.2	4.31804	95.6311	75.8095	52.2036	48.3813	25.04	135.056	128.745	60.2754	6.15225	7	36.9115	7.70677
Ba (µg/L)	161.966	385	731	817.547	731.471	114.9	194.373	163.527	4160	268.42	6190	688.709	483.952	312.865	119.114	936.477	480	2920	80.2746
Be (µg/L)	<1.0	<1.0	<1.0	<1.0	<1.0	<0.5	<0.5	<1.0	<1.0	<1.0	<1.0	<1.0	<1.0	<1.0	<1.0	<1.0	<1.0	<1.0	<1.0
Cd (µg/L)	10.6173	<0.5	<0.5	<0.5	1.93921	2.4081	2.17396	<0.5	<0.5	<0.5	<0.5	<0.5	0.474145	<0.5	<0.5	<0.5	<0.5	<0.5	4.77556
Co (µg/L)	18.9457	45.8	59.8932	44.5288	23.7574	5.29627	4.61768	85.2763	27.0557	40.5656	25.54	44.3801	22.3501	12.8473	70.0646	2.21245	1.1	2.35123	3.68261
Cr (µg/L)	28.5554	287.676	350	100	110	17.6825	7.54772	183.737	55	135	20	20	110	100	160	<10.0	<10.0	40	<10.0
Cs (µg/L)	<1.0	3.50809	14.2858	<1.0	<1.0	<0.5	<0.5	<0.5	<1.0	27.0557	<0.5	<1.0	4.38826	<0.5	4.73209	<0.5	<1.0	<1.0	<1.0
Cu (µg/L)	253.491	113	478	55.3151	477.556	30.4662	20.2336	26.3032	30.6271	220.238	29.2247	62.9563	164.137	74.7193	292.584	65.4057	94	50.53	733.696
Li (µg/L)	23.318	36.5686	180	120	40	14	18.5217	131.953	70	2870	150.012	20	40	70	50	20	80	100	590
Mn (µg/L)	826.583	660	2680	804	2680	774.312	2770	9090	573.733	195.591	403.917	1110	1670	1700	46.9195	2590	6460	4530	4100
Mo (µg/L)	3.21424	11.1297	7.59742	5.88142	11.3197	<0.5	<0.5	6.19039	1.13049	16.7718	5.52945	2.37668	2.22257	10.9551	3.77529	<1.0	<1.0	<1.0	47.8441
Ni (µg/L)	170.203	201	573.933	396.489	154.733	71.4221	21.1716	376.895	118.829	262.584	130.912	98.038	158.944	360.129	310.614	18.1827	38	69.4786	220.188
Pb (µg/L)	109.603	6.3	7.31213	4.27972	9.54568	6.1	3.3263	1.05504	2.84245	15.3867	4.40587	1.35005	61.1368	3.71609	10.8455	3.39917	7.8	4.73623	20.9464
Rb (µg/L)	131.404	236	637.873	169.415	82.4087	45.9278	56.1288	333.686	23.1274	300.295	39.0876	147.028	151.534	43.558	561.743	11.5021	9	4.3905	3.79042
Sb (µg/L)	3.53662	8.79179	18.6841	4.96591	5.45848	1.65834	<0.5	14.5618	<1.0	4.79619	<1.0	<1.0	16.3097	2.65642	2.15845	<1.0	<1.0	<1.0	<1.0
Se (µg/L)	20	51.6601	50	30	29.2131	<5.0	<5.0	25.2519	37.0223	40	30	30	26.2767	200	60	10	10	15.3656	17.0792
Sn (µg/L)	NAh	51.916	10.148	22.2421	6.04663	NAh	NAh	12.4855	1.60207	23.4685	1.55243	3.73528	8.80953	1.41385	57.8966	10.9986	2	<1.0	1.68145
Landfill Characteristic	LF 1	LF 2	LF 3	LF 4	LF 5	LF 6	LF 7	LF 8	LF 9	LF 10	LF 11	LF 12	LF 13	LF 14	LF 15	LF 16	LF 17	LF 18	LF 19
Sr (µg/L)	1280	1120	1070	1730	2160	1080	782.697	3810	3560	857.575	2990	1720	912.297	5410	674.329	7370	5530	3500	5260
Tl (µg/L)	<1.0	<1.0	<1.0	<1.0	<1.0	<0.5	<0.5	<1.0	<1.0	<0.5	<0.5	<1.0	<1.0	<0.5	<0.5	<0.5	<1.0	<1.0	<1.0
U (µg/L)	<0.1	0.27602	0.83082	2.00586	0.32101	0.8	1.16034	0.25491	<0.1	0.213313	0.0488686	<0.1	0.406595	0.408244	1.10597	0.604451	1.2	1.05697	50.5355
V (µg/L)	4.82631	233	93.1	49.813	99.3097	1.38733	1.21399	53.8893	21.5394	38.5155	25.9368	11.5179	59.4439	213.615	81.4769	11.7007	2	15.4307	2.07229
W (µg/L)	NAh	23.8305	<1.0	5.29903	11.0067	NAh	NAh	3.54022	<1.0	18.6722	2.0706	2.39185	1.2	7.43631	5.05746	<1.0	9.1	<1.0	1.83748
Zn (µg/L)	2200	437.179	3520	980	3520	177	69.3908	496.319	362.644	1580	130	120	1350	140	1620	140	1650	646.697	3330
a million tons, b million gallons, c leachate stored at landfill site then trucked and discharged to wastewater treatment plant (WWTP) or nearby sewer line leading to WWTP, d leachate discharged directly to sewere line leading to WWTP, e leachate is stored on site then irrigated on the landfill tip as waste is discarded, f leacahte is stored on site then injected into the waste in the landfill, g…

## Sheet: Table2S_nonDetects
Chemicala	CASRNb	RLc range (ng/L)	Primary Chemical Use
Household Compounds
benzo(a)pyrene (4)	50-32-8	100 - 4,000	polycyclic aromatic hydrocarbon (PAH)
ethanol,2-butoxy-,phosphate (4)	78-51-3	3,200 - 128,000	plasticizer
indole (4)	120-72-9	200 - 8,000	fragrance and/or flavorant
isoquinoline (4)	119-65-3	200 - 8,000	fragrance and/or flavorant
methyl salicylate (4)	119-36-8	400 - 16,000	fragrance and/or flavorant
tonalide (4)	21145-77-7	200 - 8,000	polycyclic musk fragrance
Industrial Compounds
2,2',4,4'-tetrabromodiphenylether (4)	5436-43-1	200 - 8,000	flame retardant
2,6-dimethylnaphthalene (4)	581-42-0	200 - 8,000	component of diesel/kerosene
4-n-octylphenol (4)	1806-26-4	100 - 4,000	nonionic detergent degradate
5-methyl-1H-benzotriazole (4)	136-85-6	1,600 - 64,000	antioxidant in antifreeze and deicers
anthraquinone (4)	84-65-1	200 - 8,000	dye/textiles, seed treatment, bird repellent
carbazole (4)	86-74-8	100 - 4,000	dyes, explosives, and lubricants
chirald (2)	38345-66-3	8,000 - 32,000	plasticizer for polymers and resins
fluoranthene (4)	206-44-0	100 - 4,000	component of coal tar and asphalt
pyrene (4)	129-00-0	100 - 4,000	component of coal tar and asphalt
tetrachloroethylene (4)	127-18-4	800 - 32,000	solvent, degreaser
Nonprescription Pharmaceuticals and Degradates
hydrocortisone (1)	50-23-7	1470	glucocorticoid steroid
Pesticides and Degradates
3,4-dichlorophenyl isocyanate (4)	102-36-3	1600 - 64,000	diuron degradate
bromacil (4)	314-40-9	800 - 32,000	herbicide
chlorpyrifos (4)	2921-88-2	600 - 24,000	insecticide
diazinon (4)	333-41-5	1,600 - 64,000	insecticide
dichlorvos (4)	62-73-7	400 - 16,000	insecticide, trichlofon degradate
metalaxyl (4)	57837-19-1	800 - 32,000	fungicide
metolachlor (4)	51218-45-2	200 - 8,000	herbicide
prometon (4)	1610-18-0	800 - 32,000	herbicide
Prescription Pharmaceuticals and Degradates
2-ethyl-2-phenylmalonamide (2)	7206-76-0	5,000 - 20,000	primidone degradate
alprazolam (1)	28981-97-7	210	anxiolytic
amitriptyline (1)	50-48-6	370	tricyclic antidepressant
benztropine (1)	86-13-5	150	anticholinergic
betamethasone (1)	378-44-9	1140	glucocorticoid steroid
butalbital (2)	77-26-9	8,000 - 32,000	barbituate
celecoxib (2)	169590-42-5	32000	non-steroidal anti-inflammatory
citalopram (1)	59729-33-8	65	antidepressant, anxiety disorders
clonidine (1)	4205-90-7	600	antihypertensive
diazepam (1)	439-14-5	22	antianxiety, sleep aid, anticonvulsant
efavirenz (2)	154598-52-4	16,000 - 64,000	antiretroviral
ezetimibe (1)	163222-33-1	630	cholestrol reduction
fadrozole (1)	102676-47-1	73	aromatase inhibitor
fluoxetine (1)	54910-89-3	260	antidepressant
fluticasone (1)	90566-53-3	46	synthetic corticsteroid
griseofulvin (2)	126-07-8	16,000 - 64,000	antifungal
hydrocodone (1)	125-29-1	100	opioid
hydroxyzine (1)	68-88-2	74	antihistamine, sedative
iminostilbene (1)	256-96-2	1450	anticonvulsant, tricyclic antidepressant
ketoconazole (1)	65277-42-1	1130	antifungal
meperidine (2)	57-42-1	4,000 - 16,000	opioid pain reliever
methotrexate (1)	59-05-2	520	antifolate
methylphenidate (2)	113-45-1	4,000 - 16,000	psychostimulant
nizatidine (1)	76963-41-2	190	acid inhibitor
nordiazepam (1)	1088-11-5	410	diazepam degradate
norfluoxetine (1)	56161-73-0	1990	fluoxetine degradate
norpropoxyphene (2)	3376-94-1	16,000 - 64,000	dextropropoxyphene degradate
norverapamil (1)	67018-85-3	85	verapamil degradate
Chemicala	CASRNb	RLc range (ng/L)	Primary Chemical Use
omeprazole (1)	73590-58-6	56	proton pump inhibitor
penciclovir (1)	39809-25-1	400	antiviral
phenobarbital (2)	50-06-6	8,000 - 32,000	barbiturate
promethazine (1)	60-87-7	500	antihistamine, antiemetic, sedative
propranolol (1)	525-66-6	260	beta blocker, antihypertensive
sertraline (1)	79617-96-2	160	antidepressant
sitagliptin (1)	790712-60-6	970	antihyperglycemic
ticlopidine (2)	551-42-85-3	4,000 - 16,000	adenosine diphosphate receptor inhibitor
tiotropium (1)	186691-13-4	430	anticholinergic
valacyclovir (1)	124832-26-4	1630	antiviral
Steriods and Hormones
11-ketotestosterone (3)	53187-98-7	2	natural androgen, testosterone degradate
17-alpha-ethynyl estradiol (3)	57-63-6	0.8	synthetic estrogen
17-alpha-estradiol (3)	57-91-0	0.8	natural estrogen
4-androstene-3,17-dione (3)	63-05-8	0.8	natural androgen, testosterone precursor
equilenin (3)	517-09-9	2	natural equine estrogen, hormone replacement therapy
equilin (3)	474-86-2	4	natural equine estrogen, hormone replacement therapy
mestranol (3)	72-33-3	0.8	synthetic estrogen
norethindrone (3)	68-22-4	0.8	synthetic progestin
progesterone (3)	57-83-0	8	natural progestin
testosterone (3)	58-22-0	0.8	natural androgen
a Method: (1) = LC/MS/MS pharmaceutical, (2) = GC/MS pharmaceutical, (3) = GC/MS/MS steroid hormones, (4) = GC/MS household/industrial chemicals, b chemical abstracting service report, c reporting limit (RL)

## Sheet: table3S_Blank_pharms
LC/MS/MS Pharmaceutical Chemicals	LF 13
	Samplea	Field Blank
10-hydroxy-amitriptyline	<83.0	<83
abacavir	<82.0	<82
acetaminophen	39800	<71
acyclovir	12220.2	<220
albuterol	<60.0	<60
alprazolam	<210	<210
amitriptyline	<370	<370
amphetamine	5390	<81
antipyrene	<1,160	<1,160
atenolol	4910	<130
atrazine	<190	<190
benztropine	<150	<150
betamethasone	<1,140	<1,140
bupropion	<170	<170
caffeine	1910	<900
carbamazepine	2590	<41
carisoprodol	3400	<120
chlorpheniramine	<46.0	<46
cimetidine	2180	<270
diltiazem	<100	<100
citalopram	<65.0	<65
clonidine	<600	<600
codeine	<880	<880
cotinine	40690	<63
dehydronifedipine	<240	<240
desvenlafaxine	1820	<74
dextromethorphan	E 63.0	<82
diazepam	<22.0	<22
diphenhydramine	<57.0	<57
duloxetine	<360	<360
erythromycin	<530	<530
ezetimibe	<630	<630
fadrozole	<73.0	<73
famotidine	<100	<100
fenofibrate	<62.0	<62
fexofenadine	316.259	<190
fluconazole	2510	<710
fluoxetine	<260	<260
fluticasone	<46.0	<46
fluvoxamine	<530	<530
glipizide	<340	<340
glyburide	<39.0	<39
hydrocodone	<100	<100
hydrocortisone	<1,470	<1,470
LC/MS/MS Pharmaceutical Chemicals	LF 13
	Samplea	Field Blank
hydroxyzine	<74.0	<74.0
iminostilbene	<1,450	<1,450
ketoconazole	<1,130	<1,130
lamivudine	<160	<160
lidocaine	147000	<150
loperamide	<110	<110
loratadine	<69.0	<69.0
lorazepam	<1,160	<1,160
meprobamate	1290	<860
metaxalone	775.275	<150
metformin	522.194	<130
methadone	<76.0	<76.0
methocarbamol	<87.0	<87.0
methotrexate	<520	<520
methyl-1H-benzotriazole	10900	<1,410
metoprolol	<270	<270
morphine	<140	<140
nadolol	1650	<800
N-desmethyldiltiazem	<150	<150
nicotine	86900	<570
nizatidine	<190	<190
nordiazepam	<410	<410
norfluoxetine	<1,900	<1,900
norverapamil	<85.0	<85.0
orlistat	<520	<520
oseltamivir	<140	<140
oxazepam	<1,400	<1,400
oxycodone	<240	<240
paraxantine	<200	<200
paroxetine	<200	<200
penciclovir	<400	<400
pentoxyfylline	707.452	<93.0
phenazopyridine	<130	<130
phendimetrazine	<310	<310
phenytoin	E 4,230	<1,800
piperonylbutoxide	119.81	<30.0
prednisolone	<1,500	<1,500
prednisone	<1,680	<1,680
promethazine	<500	<500
propanolol	<260	<260
propoxyphene	<170	<170
pseudoephederine	44100	<110
quinine	<790	<790
raloxifene	<97.0	<97.0
LC/MS/MS Pharmaceutical Chemicals	LF 13
	Samplea	Field Blank
ranitidine	<1,920	<1,920
sertraline	<160	<160
sitagliptin	<970	<970
sulfadimethoxine	51340	<650
sulfamethizole	<1,040	<1,040
sulfamethoxazole	<260	<260
tamoxifen	<520	<520
temazepam	<180	<180
theophylline	<410	<410
thiabendazole	1170	<41.0
tiotropium	<430	<430
tramadol	1980	<150
triamterene	<52.0	<52.0
trimethoprim	<190	<190
valacyclovir	<1,630	<1,630
venlafaxine	<44.0	<44.0
verapamil	<150	<150
warfarin	135.311	<60.0
a concentration: E = flagged due to concentration being less than the reporting limit or greater than highest point on calibration curve

## Sheet: table4S_Blanks_hormones
Hormone Steroid Chemicals	LF 3			LF 16
	Sample	Field Blank		Sample	Field Blank
11-ketotestosterone	<2.00	<5.20		<2.00	<2.00
17-alpha-estradiol	<8.71	<2.08		0.85	<0.800
17-alpha-ethynyl estradiol	<1.05	<2.08		<0.800	<0.800
17-beta-estradiol	11	<2.08		3.35	<0.800
19-norethindrone	<0.80	<2.08		<0.800	<0.800
3-beta-coprostanol	35200	<520		<200	<200
4-androstene-3,17-dione	<0.80	<2.08		<0.800	<0.800
bisphenol A (BPA)	4080000	<260		13300	<100
cholesterol	9560	<520		<200	<200
diethylstilbestrol	<0.800	<2.08		<0.800	<0.800
dihydrotestosterone	<4.00	<10.4		<4.00	<4.00
epitestosterone	<4.00	<10.4		<2.00	<2.00
equilenin	<2.00	<5.20		<13.9	<2.00
equilin	<4.00	<10.4		<8.00	<8.00
estriol	16.3	<5.20		2.78	<2.00
estrone	168	<2.08		28.7	<0.800
mestranol	<2.08	<2.08		<0.800	<0.800
progesterone	<2.08	<2.08		<8.00	<8.00
testosterone	<2.08	<2.08		<1.60	<1.60
cis-Androsterone	84.4	<2.08		<9.25	<0.800

## Sheet: table5S_Blank_WW
Household/Industrial Chemicals	LF 3			LF 16			Laboratory Blanks
	Samplea	Field Blanka		Samplea	Field Blanka		Blank 1	Blank 2	Blank 3
1,4-dichlorobenzene	<4,000	<4,000		<4,000	<4,000		<80.0	<80.0	<80.0
1-methylnaphthalene	<2,000	<2,000		<2,000	<2,000		1.8	1.9	<40.0
2,2',4,4'-tetrabromodiphenylether	<2,000	<2,000		<2,000	<2,000		<40.0	<40.0	<40.0
2,6-dimethylnaphthalene	<2,000	<2,000		<2,000	<2,000		<40.0	<40.0	<40.0
2-methylnaphthalene	<2,000	<2,000		E 511	<2,000		2.8	2.9	2.3
3,4-dichlorophenyl isocyanate	<16,000	<16,000		<16,000	<16,000		8.2	<320	9.5
4-cumylphenol	E 28,600	<2,000		<2,000	<2,000		<40.0	<40.0	<40.0
4-n-octylphenol	<5,110	<1,000		<1,000	<1,000		<20.0	<20.0	<20.0
4-nonylphenol diethoxylate	<80,000	<80,000		E 17,500	<80,000		<1,600	<1,600	<1,600
4-nonylphenol monoethoxylate	<80,000	<80,000		<80,000	<80,000		<1,600	<1,600	<1,600
4-tert-octylphenol	<20,000	<20,000		<20,000	<20,000		18	<400	14
4-tert-octylphenol diethoxylate	<10,000	<10,000		<10,000	<10,000		<200	<200	<200
4-tert-octylphenol monoethoxylate	E v 34,600	<30,000		<30,000	<30,000		83.8	43.8	<600
5-methyl-1H-benzotriazole	<16,000	<16,000		<16,000	<16,000		<320	<320	<320
acetophenone	v 48,200	<20,000		21300	<20,000		68.5	70.4	67.4
anthracene	<1,000	<1,000		<1,000	<1,000		<20.0	<20.0	<20.0
anthraquinone	<2,000	<2,000		<2,000	<2,000		<40.0	<40.0	<40.0
benzo(a)pyrene	<1,000	<1,000		<1,000	<1,000		<20.0	<20.0	<20.0
benzophenone	13800	<4,000		14200	<4,000		5.3	8	6.5
beta-sitosterol	E 136,000	<240,000		<240,000	<240,000		<4,800	<4,800	<4,800
bromacil	<8,000	<8,000		<8,000	<8,000		<160	<160	<160
bromoform	<8,000	<8,000		<8,000	<8,000		<160	<160	<160
camphor	205000	<4,000		40400	<4,000		<80	9.4	<80
carbaryl	<3,000	<3,000		<3,000	<3,000		<60	<60	<60
carbazole	<1,000	<1,000		<1,000	<1,000		<20.0	<20.0	<20.0
chlorpyrifos	<6,000	<6,000		<6,000	<6,000		<120	<120	<120
cumene (isopropylbenzene)	<2,000	<2,000		4730	<2,000		1.7	2.7	1.7
diazinon	<16,000	<16,000		<16,000	<16,000		<320	<320	<320
dichlorvos	<55,700	< 55,700		<4,000	<9,040		8.6	9.3	<80.0
diethyl phthalate	v 23,000	<20,000		E 17,700	<20,000		<400	23.8	8.8
diethylhexyl phthalate	<100,000	<100,000		<100,000	<100,000		237	68.2	76.2
d-limonene	<8,000	<8,000		<8,000	<8,000		11.8	<160	15.8
ethanol,2-butoxy-,phosphate	<32,000	<32,000		<32,000	<32,000		529	<640	<640
ethyl citrate	<2,000	<2,000		<2,000	<2,000		3.2	<40.0	<40.0
fluoranthene	<1,000	<1,000		<1,000	<1,000		0.6	0.7	2.3
galaxolide	<2,000	<2,000		<2,000	<2,000		1.8	3.2	<40
indole	<2,000	<2,000		<2,000	<2,000		<40.0	<40.0	<40.0
isophorone	<2,500	<2,500		4880	<2,500		<50.0	<50.0	<50.0
Household/Industrial Chemicals	LF 3			LF 16			Laboratory Blanks
	Samplea	Field Blanka		Samplea	Field Blanka		Blank 1	Blank 2	Blank 3
isoquinoline	<2,000	<2,000		<2,000	<2,000		<40	<40	<40
menthol	<16,000	<16,000		<16,000	<16,000		<320	<320	<320
metalaxyl	<8,000	<8,000		<8,000	<8,000		<160	<160	<160
methyl salicylate	<4,000	<4,000		<4,000	<4,000		<80	6.9	4
metolachlor	<2,000	<2,000		<2,000	<2,000		<40	<40	<40
N,N-diethyltoluamide (DEET)	254000	<2,000		45800	<2,000		<40	<40	3.3
naphthalene	E 5,120	v 5,630		2450	<1,000		2.6	3	3
para-cresol	E 3,490,000	<4,000		112000	<4,000		<80	<80	<80
para-nonylphenol-total	83200	<80,000		<80,000	<80,000		<1,600	<1,600	<1,600
pentachlorophenol	E 52,800	<125,000		<125,000	<125,000		<2,500	<2,500	<2,500
phenanthrene	<1,000	<1,000		<1,000	<1,000		1	2	1.4
phenol	1390000	<8,000		106000	<8,000		14.2	14	12.8
prometon	<8,000	<8,000		<8,000	<8,000		<160	<160	<160
pyrene	<1,000	<1,000		<1,000	<1,000		0.8	0.9	0.9
skatol	23000	<2,000		2800	<2,000		<40	<40	<40
stigmastanol	163000	<170,000		<170,000	<170,000		<3,400	<3,400	<3,400
tetrachloroethylene	<8,000	<8,000		<8,000	<8,000		<160	<160	<160
tonalide	<2,000	<2,000		<2,000	<2,000		<40	<40	<40
tri(2-chloroethyl) phosphate	<8,000	<8,000		<8,000	<8,000		57.4	<160	<160
tri(dichlorisopropyl) phosphate	<16,000	<16,000		<16,000	<16,000		316	<320	332
tributylphosphate	E 5,010	<3,200		5930	<3,200		<64	<64	<64
triclosan	<16,000	<16,000		E 7,740	<16,000		403	109	<320
triphenyl phosphate	<4,000	<4,000		<4,000	<4,000		10.1	<80	10.7
a concentration: E = flagged due to concentration being less than the reporting limit or greater than highest point on calibration curve, v = flagged if compound was detected in laboratory blanks between 3 and 10 times the blank concentration

## Sheet: table6S_rep_pharms
Pharmaceutical chemicals	LF 4		RPDa		LF 15		RPDa
	Sample	Replicate			Sample	Replicate
10-hydroxy-amitriptyline	<210	<410			<83	<83
abacavir	<82.0	<82.0			<82	<82
acetaminophen	5290	5390	0.0189821		<71	<71
aciclovir	2720	3320	0.196695		<220	<220
albuterol e	135.74	137.416	0.0122728		<60	<60
alprazolam	<210	<210			<210	<210
amitriptyline	<370	<370			<370	<370
amphetamine	419.509	377.878	0.104417		<81	<81
antipyrene	<1,160	<1,160			<1,160	<1,160
atenolol	1040	948.214	0.0944664		<130	<130
atrazine	<213	<236			<190	<190
benztropine	<150	<150			<150	<150
betamethasone	<1,140	<1,140			<1,140	<1,140
bupropion	<170	<170			<170	<170
caffeine	1003.76	<900			<900	<900
carbamazepine	330.52	326.027	0.0136875		<41	<41
carisoprodol	321.495	415.075	0.254098		796.41	944.02	0.169625
chlorpheniramine	<46.0	<46.0			<46	<46
cimetidine	<270	<270			<270	<270
cis-diltiazem	<100	<100			<100	<100
citalopram	<65.0	<65.0			<65	<65
clonidine	<600	<600			<600	<600
codeine	<880	<880			<880	<880
cotinine	4550	4730	0.0379548		3540.82	2741.42	0.254497
dehydronifedipine	<308	<240			<240	<240
desvenlafaxine	103.743	90.3982	0.137471		<74	<74
dextromethorphan	<82.0	<82.0			<82	<82
diazepam	<22.0	<22.0			<22	<22
diphenhydramine	<57.0	<57.0			<57	<57
duloxetine	<360	<360			<360	<360
erythromycin	<56.0	<530			<530	<530
ezetimibe	<630	<630			<630	<630
fadrozole	<73.0	<73.0			<73	<73
famotidine	<100	<100			<100	<100
fenofibrate	<62.0	<62.0			<62	<62
fexofenadine	316.259	<190			<190	<190
fluconazole	1519.51	1530	0.00419902		<710	<710
fluoxetine	<260	<260			<260	<260
fluticasone	<46.0	<46.0			<46	<46
fluvoxamine	<530	<530			<530	<530
glipizide	<340	<340			<340	<340
glyburide	25.8367	17.3646	0.392214		<39	<39
hydrocodone	<100	<100			<100	<100
hydrocortisone	<1,470	<1,470			<1,470	<1,470
Pharmaceutical chemicals	LF 4		RPDa		LF 15		RPDa
	Sample	Replicate			Sample	Replicate
hydroxyzine	<74.0	<74.0			<74	<74
iminostilbene	<1,450	<1,450			333.989	420.022	0.228201
ketoconazole	<1,130	<1,130			<1,130	<1,130
lamivudine	<178	<195			<160	<160
lidocaine	28300	29300	0.0330659		5610.09	5803.54	0.0338968
loperamide	<110	<110			<110	<110
loratadine	<69.0	<69.0			<69	<69
lorazepam	<6,850	<7,820			<1,160	<1,160
meprobamate	<860	<860			586.225	437.213	0.2912
metaxalone	1710	1510	0.123965		<150	<150
metformin	1930	1960	0.0128296		<130	<130
methadone	<76.0	<76.0			<76.0	<76.0
methocarbamol	<87.0	<87.0			<87.0	<87.0
methotrexate	<520	<520			<520	<520
methyl-1H-benzotriazole	6480	6990	0.0771587		2050	1650	0.216216
metoprolol	<270	<270			92.2523	121.248	0.271618
morphine	<140	<140			<140	<140
nadolol	<800	<800			<800	<800
N-desmethyldiltiazem	<150	<150			<150	<150
nicotine	<1,210	<1,180			<570	<570
nizatidine	<190	<190			<190	<190
nordiazepam	<410	<410			<410	<410
norfluoxetine	<1,900	<1,900			<1,900	<1,900
norverapamil	<85.0	<85.0			<85	<85
orlistat	<520	<520			<520	<520
oseltamivir	<140	<140			<140	<140
oxazepam	<1,400	<1,400			<1,400	<1,400
oxycodone	<240	<240			<240	<240
paraxanthine	<200	<200			<200	<200
paroxetine	<200	<200			<200	<200
penciclovir	<400	<400			<400	<400
pentoxyfylline	446.313	<93.0			781.355	581.776	0.292823
phenazopyridine	<130	<130			<130	<130
phendimetrazine	<310	<310			<310	<310
phenytoin	<1,800	<1,800			<1,800	<1,800
piperonylbutoxide	48.705	34.4192	0.343722		52.7407	87.6043	0.496827
prednisolone	<1,500	<1,500			<1,500	<1,500
prednisone	<1,680	<1,680			<1,680	<1,680
promethazine	<500	<500			<500	<500
propanolol	<260	<260			<260	<260
propoxyphene	<170	<170			<170	<170
pseudoephederine	356.611	380.803	0.0656128		<110	<110
quinine	<790	<790			<790	<790
raloxifene	<97.0	<97.0			<97.0	<97.0
ranitidine	<1,920	<1,920			<1,920	<1,920
Pharmaceutical chemicals	LF 4		RPDa		LF 15		RPDa
	Sample	Replicate			Sample	Replicate
sertraline	<160	<160			<160	<160
sitagliptin	<970	<970			<970	<970
sulfadimethoxine	<650	<650			<650	<650
sulfamethizole	<1,040	<1,040			<1,040	<1,040
sulfamethoxazole	<260	<260			<260	<260
tamoxifen	<520	<520			<520	<520
temazepam	<180	<180			<180	<180
theophylline	<410	<410			<410	<410
thiabendazole	745.525	822.274	0.0979064		<41.0	<41.0
tiotropium	<430	<430			<430	<430
tramadol	565.4	565.458	5.89008e-05		<150	<150
triamterene	<52.0	<52.0			<52.0	<52.0
trimethoprim	<190	<190			<190	<190
valacyclovir	<1,630	<1,630			<1,630	<1,630
venlafaxine	<129	<175			<44.0	<44.0
verapamil	<150	<150			<150	<150
warfarin	25.393	16.2391	0.43975		<60.0	<60.0
a RPD = |A-B| / ((A+B)/2)*100

## Sheet: table7S_rep_hormones
Steroid Hormone Chemicals	LF 4		RPDa		LF 15		RPDa
	Sample	Replicate			Sample	Replicate
11-ketotestosterone	<2.00	<2.00			<4.26	<4.04
17-alpha-ethynyl estradiol	<0.800	<0.800			<1.70	<1.62
17-beta-estradiol	<0.800	<0.800			<1.70	<1.62
19-norethindrone	<0.800	<0.800			<1.70	<1.62
3-beta-coprostanol	16400	15400	0.063		936	692	0.3
4-androstene-3,17-dione	9.1	14	0.424		<1.70	<1.62
bisphenol A (BPA)	21670	34780	0.464		638000	559000	0.134
cholesterol	10200	9860	0.034		<426	<404
diethylstilbestrol	<0.800	<0.800			<1.70	<1.62
dihydrotestosterone	9.29	<11.2			<8.52	<8.08
epitestosterone	<4.00	<4.00			<4.26	<4.04
equilenin	<2.00	<2.00			<4.26	<42.5
equilin	<4.00	<4.00			<17.0	<16.2
estriol	9.49	5.94	0.46		<4.26	<4.04
estrone	<6.62	<5.16			<1.70	<5.12
mestranol	<0.800	<0.800			<1.70	<1.62
progesterone	<8.00	<8.00			<17.0	<16.2
testosterone	<13.0	14			<3.41	<8.59
cis-androsterone	74.4	76.3	0.025		82.8	68	0.196
a RPD = |A-B| / ((A+B)/2)*100

## Sheet: table8S_rep_WW
Household/Industrial Chemicals	LF 4		RPDb		LF 15		RPDb
	Samplea	Replicatea			Samplea	Replicatea
1,4-dichlorobenzene	<4,000	<4,000			<4,000	<4,000
1-methylnaphthalene	<2,000	<2,000			<2,000	<2,000
2,2',4,4'-tetrabromodiphenylether	<2,000	<2,000			<2,000	<2,000
2,6-dimethylnaphthalene	<2,000	<2,000			<2,000	<2,000
2-methylnaphthalene	<2,000	<2,000			<2,000	<2,000
3,4-dichlorophenyl isocyanate	<16,000	<16,000			<16,000	<16,000
4-cumylphenol	<2,000	<2,000			E 4,280	E 6,050	0.242
4-n-octylphenol	<1,000	<1,000			<1,000	<1,000
4-nonylphenol diethoxylate	<80,000	<80,000			<80,000	<80,000
4-nonylphenol monoethoxylate	<80,000	<80,000			<80,000	<80,000
4-tert-octylphenol	E v 6,870	E v 6,340	0.053		<20,000	<20,000
4-tert-octylphenol diethoxylate	<27.2	< 32.4			<10,000	<10,000
4-tert-octylphenol monoethoxylate	E v 15,300	E v 18,800	0.142		<30,000	<30,000
5-methyl-1H-benzotriazole	<16,000	<16,000			<16,000	<16,000
acetophenone	<20,000	<20,000			<20,000	<20,000
Anthracene	<1,000	<1,000			2710	3090	0.089
anthraquinone	<2,000	<2,000			<2,000	<2,000
benzo(a)pyrene	<1,000	<1,000			<1,000	<1,000
benzophenone	<4,000	<4,000			5410	8490	0.308
beta-sitosterol	<240,000	<240,000			<240,000	<240,000
bromacil	<8,000	<8,000			<8,000	<8,000
bromoform	<8,000	<8,000			<8,000	<8,000
camphor	97200	60000	0.292		96700	141000	0.265
carbaryl	<3,000	<3,000			<3,000	<3,000
carbazole	<1,000	<1,000			<1,000	<1,000
chlorpyrifos	<6,000	<6,000			<6,000	<6,000
cumene (isopropylbenzene)	<2,000	<2,000			<2,000	<2,000
diazinon	<16,000	<16,000			<16,000	<16,000
dichlorvos	<19,200	< 22,700			<4,000	<4,000
diethyl phthalate	v 14,100	v 23,900	0.376		<20,000	<20,000
diethylhexyl phthalate	<100,000	E v 65,100			<100,000	<100,000
d-limonene	<8,000	<8,000			<8,000	<8,000
ethanol,2-butoxy-,phosphate	<32,000	<32,000			<32,000	<32,000
ethyl citrate	<2,000	<2,000			<2,000	<2,000
fluoranthene	<1,000	<1,000			<1,000	<1,000
galaxolide	<2,000	<2,000			<2,000	<2,000
indole	<2,000	<2,000			<2,000	<2,000
isophorone	<2,500	<2,500			<2,500	<2,500
isoquinoline	< 29,400	< 29,700			<2,000	<2,000
menthol	82900	70000	0.109		<16,000	<16,000
metalaxyl	<8,000	<8,000			<8,000	<8,000
methyl salicylate	<4,000	<4,000			<4,000	<4,000
metolachlor	<2,000	<2,000			<2,000	<2,000
N,N-diethyltoluamide (DEET)	152000	149000	0.013		110000	109000	0.006
Household/Industrial Chemicals	LF 4		RPDb		LF 15		RPDb
	Samplea	Replicatea			Samplea	Replicatea
naphthalene	v 1,350	<2,000			<2,000	<2,000
para-cresol	17100	<13,800			4700	4700	0
para-nonylphenol-total	<80,000	<80,000			<80,000	<80,000
pentachlorophenol	<125,000	<125,000			<125,000	<125,000
phenanthrene	<1,000	<1,000			<1,000	<1,000
phenol	v 7,760	v 8,280	0.044		<8,000	<8,000
prometon	<8,000	<8,000			<8,000	<8,000
pyrene	<1,000	<1,000			<1,000	<1,000
skatol	<2,000	<2,000			<2,000	<2,000
stigmastanol	121000	<170,000			<170,000	<170,000
tetrachloroethylene	<8,000	<8,000			<8,000	<8,000
tonalide	<2,000	<2,000			<2,000	<2,000
tri(2-chloroethyl)phosphate	<8,000	<8,000			<8,000	<8,000
tri(dichlorisopropyl)phosphate	<32,000	v 36,400			<16,000	<16,000
tributylphosphate	<3,200	<3,200			<3,200	<3,200
triclosan	<16,000	<16,000			<16,000	<16,000
triphenyl phosphate	<4,000	4640			<4,000	<4,000
a concentration: E = flagged due to concentration being less than the reporting limit or greater than highest point on calibration curve, v = flagged if compound was detected in laboratory blanks between 3 and 10 times the blank concentration, b RPD = |A-B| / ((A+B)/2)*100

## Sheet: wastetype_Table9S
Waste Composition Category	Number of Landfills	Waste-Type Category	CECa Detections Min.b - Max.c [Median]	Kruskal-Wallis Rank Test on CECa Detections	Total Measured CECa Concentrations (ng/L) Min.b - Max.c [Median]	Kruskal-Wallis Rank Test on CECa Concentrations (2-sided)
Nonprescription and Prescription Pharmaceuticals
Wastewater sludge	9	No wastewater sludge	4 - 63 [17]	p-value = 0.902, chi = 0.015, df = 1	8,577 - 1,020,197 [244,835]	p-value = 0.935, chi = 0.097, df = 1
Wastewater sludge	10	11 - 2% wastewater sludge	5 - 55 [12]		189 - 1,139,626 [259,769]
Municipal waste	5	<70% municipal waste	8 - 22 [13]	p-value = 0.763, chi = 0.542, df = 2	17,633 - 559,564 [392,151]	p-value = 0.227, chi = 2.968, df = 2
Municipal waste	5	70 - 80% municipal waste	6 - 55 [12]		8,577 - 1,139,626 [393,824]
Municipal waste	9	>80% municipal waste	4 - 63 [17]		189 - 1,020,197 [156,257]
Industrial waste	10	No industrial waste	4 - 63 [17]	p-value = 0.935, chi = 0.007, df = 1	189 - 1,139,626 [178,354]	p-value = 0.514, chi = 0.427, df = 1
Industrial waste	9	50 - 3% industrial waste	6 - 55 [12]		8,577 - 889,289 [310,995]
Household Chemicals
Municipal waste	5	<70% municipal waste	4 - 8 [4]	p-value = 0.092d, chi = 4.779, df = 2	106,640 - 6,596,190 [353,770]	p-value = 0.087d, chi = 4.888, df = 2
Municipal waste	5	70 - 80% municipal waste	4 - 10 [8]		157,030 - 4,714,979 [636,980]
Municipal waste	9	>80% municipal waste	0 - 8 [6]		0 - 3,779,210 [122,135]
Industrial waste	10	No industrial waste	0 - 8 [6]	p-value = 0.561, chi = 0.338, df = 1	0 - 4,714,979 [137,458]	p-value = 0.10d, chi = 2.667, df = 1
Industrial waste	9	50 - 3% industrial waste	4 - 10 [5]		106,640 - 6,596,190 [353,770]
Industrial Chemicals
Industrial waste	10	No industrial waste	1 - 14 [6]	p-value = 0.459, chi = 0.549, df = 1	4,970 - 8,691,173 [165,631]	p-value = 0.870, chi = 0.027, df = 1
Industrial waste	9	50 - 3% industrial waste	2 - 9 [7]		8,980 - 1,331,434 [141,716]
a Contaminants of Emerging Concern, b minimum, c maximum, d p-value of ≤0.10 was used to indicate a signifcant difference between one or more of the sample distributions in the waste-type categories
[Shading and non-shading indicates groups of waste-type categories used for comparisons in the statisitcal analysis]

## Sheet: Table10S_TIC ABUNDANCE MATRIX 
Chemical	CASRNa	Chemical Class	LF																			Sum Det.b
			5	1	4	17	18	2	12	13	16	7	11	3	6	14	9	15	19	10	8
2(3H)-benzothiazolone	934-34-9	polyaromatic hydrocarbon (derivative)	X		X		X	X			X		X	X		X	X	X		X		11
7,9-di-tert-butyl-1-oxaspiro(4,5)deca-6,9-diene-2,8-dione	82304-66-3	aromatic hydrocarbon	X	X		X		X	X				X			X	X	X		X		10
octane, 4-methyl-	2216-34-4	branched alkene	X	X	X	X	X					X	X				X		X			9
benzenesulfonamide, N-butyl- (aka tolbutamide)	3622-84-2	amide	X		X	X		X								X	X					6
benzeneacetic acid, α-methyl-4-(2-methylpropyl)- (aka Ibuprofen)	15687-27-1	aromatic hydrocarbon	X		X			X	X					X				X				6
benzeneacetic acid	103-82-2	carboxylic acid		X				X				X		X	X					X		6
benzenepropanoic acid (aka hydrocinnamic acid)	501-52-0	carboxylic acid	X	X								X		X	X						X	6
heptane, 2,4-dimethyl-	2213-23-2	n-alkane	X		X					X			X				X		X			6
octadecanoic acid (aka stearic acid)	73992-48-0	fatty acid	X		X				X	X				X								5
octanoic acid	124-07-2	fatty acid		X						X	X	X									X	5
pentanoic acid (aka valeric acid)	109-52-4	fatty acid		X	X					X					X						X	5
hexanoic acid, 3,5,5-trimethyl-	3302-10-1	fatty acid			X				X				X							X		4
benzoic acid, p-tert-butyl-	98-73-7	carboxylic acid (derivative)	X		X			X										X				4
propanoic acid, 3-(3,5-di-tert-butyl-4-hydroxyphenyl)	20170-32-5	carboxylic acid (derivative)	X		X				X									X				4
dodecane	112-40-3	n-Alkane		X		X	X					X										4
nonanoic acid (aka nanoic acid)	112-05-0	fatty acid				X			X	X												3
cyclohexanemethanol, 4-hydroxy-α,α,4-trimethyl-	80-53-5	terpene	X					X								X						3
benzoic acid	65-85-0	carboxylic acid	X	X								X										3
benzoic acid, 3,5-dimethyl-	499-06-9	carboxylic acid (derivative)			X			X										X				3
benzoic acid, 4-methyl-	99-94-5	carboxylic acid (derivative)	X					X						X								3
heptanoic acid (aka n-heptanoic acid)	111-14-8	fatty acid		X								X			X							3
Chemical	CASRNa	Chemical Class	LF																			Sum Det.b
			5	1	4	17	18	2	12	13	16	7	11	3	6	14	9	15	19	10	8
pentane-2,4-dione (aka acetylacetone; aka 2,4-pentidione)	123-54-6	ketone (derivative)					X				X		X									3
bicyclo[2.2.1]heptan-2-one, 1,3,3-trimethyl- (aka fechone -all isomers)	7787-20-4	ketone (monoterpene)	X							X			X									3
phenol, 2,4-bis(1,1-dimethylethyl)-	96-76-4	phenol				X	X									X						3
phthalic acid, benzyl isobutyl ester (aka isobutyl benzyl phthalate)	72170-45-7	phthalate ester				X			X								X					3
dibutyl phthalate	84-74-2	phthaltate		X											X	X						3
acetylphenanthrene (unknown isomer)		polyaromatic hyrdocarbon (derivative)				X		X											X			3
hexanoic acid	142-62-1	fatty acid			X					X												2
hexanoic acid, 2-methyl-	4536-236	fatty acid										X			X							2
n-hexadecanoic acid	57-10-3	fatty acid				X			X													2
decanal	112-31-2	aldehyde															X		X			2
cyclohexane, 1,2-dichloro-, trans-	822-86-6	alkyl halide (cyclic)				X							X									2
2-cyclohexen-1-one	930-68-7	aromatic hydrocarbon		X								X										2
cyclohexanecarboxylic acid	98-89-5	carboxylic acid (derivative)		X										X								2
propanoic acid, 2-methyl-, 3-hydroxy-2,4,4-trimethylpentyl ester	74367-34-3	carboxylic acid (derivative)				X			X													2
butanoic acid	107-92-6	fatty acid								X	X											2
butanoic acid, 2-methyl-	116-53-0	fatty acid		X											X							2
n-decanoic Acid	334-48-5	fatty acid							X	X												2
tridecanoic acid (aka tridecylic acid)	638-53-9	fatty acid								X				X								2
decane	124-18-5	n-alkane				X	X															2
triethyl phosphate	78-40-0	phosphate ester	X		X																	2
benzyl butyl phthalate	85-68-7	phthalate		X											X							2
1,8-naphthalene anhydride (aka naphthalic anhydride)	81-84-5	polyaromatic hyrdocarbon (derivative)			X								X									2
Chemical	CASRNa	Chemical Class	LF																			Sum Det.b
			5	1	4	17	18	2	12	13	16	7	11	3	6	14	9	15	19	10	8
p-menth-1-en-8-ol (aka α-terpineol)	98-55-5	terpene								X	X											2
pentanoic acid, 2-methyl-	97-61-0	fatty acid										X										1
2-propanol, 1-(2-methoxypropoxy)-	13429-07-7	alcohol							X													1
2-propanol, 1-[1-methyl-2-(2-propenyloxy)ethoxy]-	55956-25-7	alcohol									X											1
2-Propanol, 1-butoxy-	5131-66-8	alcohol									X											1
Benzyl alcohol	100-51-6	alcohol										X										1
cyclohexanol	108-93-0	alcohol								X												1
cyclohexanol, 4-methyl-1-(1-methylethyl)-	470-65-5	alcohol									X											1
3,5-di-tert-butyl-1-4-hydroxybenzaldehyde	1620-98-0	aldehyde					X															1
2-pentene, 3,4-dimethyl-, (E)-	4914-92-5	alkene					X															1
2-bromo decane	13187-99-0	alkyl halide (brominated alkane)					X															1
benzenesulfonamide, N-ethyl-2-methyl- (aka N-ethyl-o-toluenesulfonamide)	1077-56-1	amide																X				1
Formamide, N-(1,1-dimethylethyl)-	2425-74-3	amide											X									1
hexadecanamide (aka palmitamide)	629-54-9	amide						X														1
octadecanamide (aka ptearamide)	124-26-5	amide						X														1
9-octadecenamide, (Z)-	301-02-0	amide														X						1
benzene, cyclohexyl-	827-52-1	aromatic hydrocarbon				X																1
benzeneacetic acid, α-methoxy-, (.+/-.)- (aka α-methoxy-benzeneacetic acid)	7021-09-2	aromatic hydrocarbon									X											1
squalene (aka supraene)	7683-64-9	branched alkene													X							1
benzenepropanoic acid, α-methyl-	1009-67-2	carboxylic acid																		X		1
benzoic acid, 2,5-dimethyl-	610-72-0	carboxylic acid (derivative)	X																			1
tetradecanoic acid, tetradecyl ester (aka myristyl myristate)	3234-85-3	carboxylic acid (derivative)																	X			1
chlorocyclohexanol	1561-86-0	chlorinated alcohol				X																1
Chemical	CASRNa	Chemical Class	LF																			Sum Det.b
			5	1	4	17	18	2	12	13	16	7	11	3	6	14	9	15	19	10	8
methoxymethyl-2,7-dimethyl cyclo hepta (aka 7-methoxymethyl-2,7-dimethylcyclohepta-1,3,5-triene)	73992-48-0	cyclic alkene ether	X																			1
diethyl carbitol	112-36-7	ether									X											1
3,3-dimethylheptanoic acid	67061-30-7	fatty acid														X						1
3-ethylheptanoic acid	14272-47-0	fatty acid					X															1
tetradecanoic acid (aka myristic acid)	544-63-8	fatty acid							X													1
butanoic acid, butyl ester	109-29-7	fatty acid alkyl ester		X																		1
propanoic acid, pentadecyl ester (aka propenoic, pentadecyl ester or pentadecyl acrylate)	43080-23-5	fatty acid alkyl ether																	X			1
butanoic acid, 2-ethyl-, methyl ester	816-11-5	fatty acid methyl ester (FAME)			X																	1
1-dodecanol	112-53-8	fatty alcohol				X																1
1-pentanol	71-41-0	fatty alcohol																			X	1
dipropylene glycol methyl ether	34590-94-8	glycol ether									X											1
3-penten-2-one, 4-methyl- (aka mesityl oxide)	141-79-7	ketone									X											1
3,5-dimethyl-2-furylmethyl ketone (aka 2-acetyl-3,5-dimethylfuran)	22940-86-9	ketone (derivative)					X															1
eicosane	112-95-8	n-alkane					X															1
heptacosane	593-49-7	n-alkane					X															1
hexadecane (aka cetane)	544-76-3	n-alkane						X														1
tetracosane	646-31-1	n-alkane					X															1
hexathiane	13798-23-7	sulfur (cyclic)	X																			1
terpin hydrate	2451-01-6	terpene												X								1
a chemical abstracting service report (Any use of trade, product, or firm names is for descriptive purposes only and does not imply endorsement by the U.S. government), b detections
